# Supplementary material for: Identification and Characterization of Novel Sources of Resistance to Rust Caused by Uromyces pisi in Pisum spp.
Source: MDPI journal article supplement (doi:10.3390/plants11172268), 2022-08-31
Supplement: s1 [file s1]

**Supplementary Table S1.** Accession list including bank code, bank origin, taxonomy, common name, germplasm origin and material type.

| Bank code | Bank origin | Taxonomy                                                               | Common name          | Germplasm origin | Material type  |
|-----------|-------------|------------------------------------------------------------------------|----------------------|------------------|----------------|
| PI 109865 | USDA        | <i>P. sativum</i> L.                                                   | ARVEJAS AMARILLAS    | Venezuela        | Landraces      |
| PI 117910 | USDA        | <i>P. sativum</i> L.                                                   | ERVILHA ANA          | Brazil           | Cultivar       |
| PI 140297 | USDA        | <i>P. sativum</i> subsp. <i>sativum</i>                                | No. 6192             | Iran             | Landraces      |
| PI 142442 | USDA        | <i>P. sativum</i> L.                                                   | ALBERJON             | Peru             | Cultivar       |
| PI 142774 | USDA        | <i>P. sativum</i> L.                                                   | G 1704               | Mexico           | Landraces      |
| PI 142776 | USDA        | <i>P. sativum</i> L.                                                   | G 1705               | Mexico           | Landraces      |
| PI 142776 | USDA        | <i>P. sativum</i> L.                                                   | G 1705               | Mexico           | Landraces      |
| PI 143483 | USDA        | <i>P. sativum</i> L.                                                   | No. 7351             | Azerbaijan       | Landraces      |
| PI 143484 | USDA        | <i>P. sativum</i> L.                                                   | CPI 135298           | Azerbaijan       | Landraces      |
| PI 143486 | USDA        | <i>P. sativum</i> L.                                                   | No. 7790             | Iran             | Landraces      |
| PI 153351 | USDA        | <i>P. sativum</i> L.                                                   | ARVEJAS VERDES       | Ecuador          | Landraces      |
| PI 162568 | USDA        | <i>P. sativum</i> L.                                                   | ORGULLO DEL MERCADA  | Argentina        | Cultivar       |
| PI 162692 | USDA        | <i>P. sativum</i> L.                                                   | CUARENTONA           | Argentina        | Cultivar       |
| PI 162693 | USDA        | <i>P. sativum</i> L.                                                   | OJO NEGRO            | Argentina        | Cultivar       |
| PI 162693 | USDA        | <i>P. sativum</i> L.                                                   | OJO NEGRO            | Argentina        | Cultivar       |
| PI 162910 | USDA        | <i>P. sativum</i> L.                                                   | L.P. NO. 7           | Paraguay         | Landraces      |
| PI 164568 | USDA        | <i>P. sativum</i> L.                                                   | Patani               | India            | Landraces      |
| PI 166082 | USDA        | <i>P. sativum</i> subsp. <i>sativum</i>                                | Matar                | India            | Landraces      |
| PI 195405 | USDA        | <i>P. sativum</i> L.                                                   | QUEZALTENANGO        | Guatemala        | Landraces      |
| PI 203065 | USDA        | <i>P. sativum</i> L.                                                   | G 6821               | Finland          | Landraces      |
| PI 204305 | USDA        | <i>P. sativum</i> L.                                                   | COLLEGIAN            | Australia        | Cultivar       |
| PI 204667 | USDA        | <i>P. sativum</i> subsp. <i>sativum</i> var. <i>sativum</i>            | STIJFSTRO            | Netherlands      | Cultivar       |
| PI 220175 | USDA        | <i>P. sativum</i> L.                                                   | No. 150              | Afghanistan      | Landraces      |
| PI 220673 | USDA        | <i>P. sativum</i> L.                                                   | Moshong              | Afghanistan      | Landraces      |
| PI 222069 | USDA        | <i>P. sativum</i> L.                                                   | Moshong              | Afghanistan      | wild           |
| PI 234262 | USDA        | <i>P. sativum</i> L.                                                   | Carlson              | USA              | Cultivar       |
| PI 254625 | USDA        | <i>P. sativum</i> L.                                                   | KELLERVA             | Finland          | Landraces      |
| PI 254626 | USDA        | <i>P. sativum</i> L.                                                   | LIMA                 | Australia        | Cultivar       |
| PI 261678 | USDA        | <i>P. sativum</i> L.                                                   | Col. No. D-237       | Netherlands      | Landraces      |
| PI 262189 | USDA        | <i>P. sativum</i> L.                                                   | BIG PEA              | Costa Rica       | Landraces      |
| PI 266069 | USDA        | <i>P. sativum</i> L.                                                   | LINE NO. 110         | Sweden           | breeding lines |
| PI 269760 | USDA        | <i>P. sativum</i> subsp. <i>sativum</i> var. <i>arvense</i> (L.) Poir. | G 16701              | UK               | breeding lines |
| PI 269763 | USDA        | <i>P. sativum</i> subsp. <i>jomardii</i> (Schränk.) Kosterin           | Aa86                 | UK               | Landraces      |
| PI 269786 | USDA        | <i>P. sativum</i> L.                                                   | Aa96                 | UK               | Landraces      |
| PI 272143 | USDA        | <i>P. sativum</i> subsp. <i>thebaicum</i>                              | THEBAICUM RUBY       | Germany          | Landraces      |
| PI 272151 | USDA        | <i>P. sativum</i> L.                                                   | UNIFLORUM            | Germany          | Landraces      |
| PI 272153 | USDA        | <i>P. sativum</i> L.                                                   | HIEMALE              | Greece           | Landraces      |
| PI 272156 | USDA        | <i>P. sativum</i> L.                                                   | HIEMALE              | Greece           | Landraces      |
| PI 280621 | USDA        | <i>P. sativum</i> L.                                                   | AMPLISSIMO SPARTANEC | Russia           | Landraces      |
| PI 280623 | USDA        | <i>P. sativum</i> L.                                                   | AMPLISSIMO PULAVSKIJ | Poland           | Landraces      |
| PI 306592 | USDA        | <i>P. sativum</i> L.                                                   | G 19029              | Hungary          | Landraces      |
| PI 312136 | USDA        | <i>P. sativum</i> L.                                                   | ALBERGA              | Guatemala        | Landraces      |
| PI 319373 | USDA        | <i>P. sativum</i> L.                                                   | CHICHARO SERRANO     | Mexico           | Landraces      |
| PI 326194 | USDA        | <i>P. sativum</i> L.                                                   | Col. No. 22340       | Mexico           | Landraces      |
| PI 343326 | USDA        | <i>P. sativum</i> L.                                                   | G 18456              | USA              | Landraces      |
| PI 343329 | USDA        | <i>P. sativum</i> L.                                                   | G 18459              | USA              | Landraces      |
| PI 343935 | USDA        | <i>P. sativum</i> L.                                                   | 6922                 | Ethiopia         | Landraces      |
| PI 343962 | USDA        | <i>P. sativum</i> L.                                                   | 22662                | Turkey           | wild           |
| PI 343965 | USDA        | <i>P. sativum</i> L.                                                   | 22706                | Turkey           | Landraces      |
| PI 343965 | USDA        | <i>P. sativum</i> L.                                                   | 22706                | Turkey           | Landraces      |
| PI 343969 | USDA        | <i>P. sativum</i> subsp. <i>sativum</i> var. <i>sativum</i>            | ARAKA                | Turkey           | Landraces      |
| PI 343981 | USDA        | <i>P. sativum</i> subsp. <i>sativum</i> var. <i>sativum</i>            | 22654                | Turkey           | Landraces      |
| PI 343984 | USDA        | <i>P. sativum</i> subsp. <i>sativum</i>                                | 22712                | Turkey           | Landraces      |
| PI 343993 | USDA        | <i>P. sativum</i> subsp. <i>sativum</i> var. <i>arvense</i> (L.) Poir. | 22652                | Turkey           | Landraces      |
| PI 347282 | USDA        | <i>P. sativum</i> L.                                                   | PLP 11               | India            | Landraces      |
| PI 347316 | USDA        | <i>P. sativum</i> L.                                                   | PLP 68               | India            | Landraces      |
| PI 347317 | USDA        | <i>P. sativum</i> L.                                                   | PLP 71               | India            | Landraces      |
| PI 347319 | USDA        | <i>P. sativum</i> L.                                                   | PLP 73               | India            | Landraces      |
| PI 347321 | USDA        | <i>P. sativum</i> L.                                                   | PLP 88               | India            | Landraces      |
| PI 347323 | USDA        | <i>P. sativum</i> L.                                                   | PLP 89               | India            | Landraces      |
| PI 347326 | USDA        | <i>P. sativum</i> L.                                                   | PLP 93               | India            | Landraces      |
| PI 347328 | USDA        | <i>P. sativum</i> L.                                                   | PLP 99               | India            | Landraces      |
| PI 347330 | USDA        | <i>P. sativum</i> L.                                                   | PLP 102              | India            | Landraces      |
| PI 347332 | USDA        | <i>P. sativum</i> L.                                                   | PLP 104              | India            | Landraces      |
| PI 347333 | USDA        | <i>P. sativum</i> L.                                                   | PLP 105              | India            | Landraces      |
| PI 347334 | USDA        | <i>P. sativum</i> L.                                                   | PLP 109              | India            | Landraces      |
| PI 347335 | USDA        | <i>P. sativum</i> L.                                                   | PLP 113              | India            | Landraces      |
| PI 347336 | USDA        | <i>P. sativum</i> L.                                                   | PLP 118              | India            | Landraces      |
| PI 347338 | USDA        | <i>P. sativum</i> L.                                                   | PLP 126              | India            | Landraces      |
| PI 347342 | USDA        | <i>P. sativum</i> L.                                                   | PLP 154              | India            | Landraces      |
| PI 347343 | USDA        | <i>P. sativum</i> L.                                                   | PLP 156              | India            | Landraces      |
| PI 347347 | USDA        | <i>P. sativum</i> L.                                                   | PLP 173              | India            | Landraces      |
| PI 347348 | USDA        | <i>P. sativum</i> L.                                                   | PLP 182              | India            | Landraces      |
| PI 347356 | USDA        | <i>P. sativum</i> L.                                                   | PLP 218              | India            | Landraces      |
| PI 347357 | USDA        | <i>P. sativum</i> L.                                                   | PLP 219              | India            | Landraces      |

|           |          |                                                                              |                               |            |           |
|-----------|----------|------------------------------------------------------------------------------|-------------------------------|------------|-----------|
| PI 347359 | USDA     | <i>P. sativum</i> L.                                                         | PLP 222                       | India      | Landraces |
| PI 347366 | USDA     | <i>P. sativum</i> L.                                                         | PLP 266                       | India      | Landraces |
| PI 347367 | USDA     | <i>P. sativum</i> L.                                                         | PLP 268                       | India      | Landraces |
| PI 347370 | USDA     | <i>P. sativum</i> L.                                                         | PLP 278                       | India      | Landraces |
| PI 347372 | USDA     | <i>P. sativum</i> L.                                                         | PLP 297                       | India      | Landraces |
| PI 347373 | USDA     | <i>P. sativum</i> L.                                                         | PLP 301                       | India      | Landraces |
| PI 347374 | USDA     | <i>P. sativum</i> L.                                                         | PLP 303                       | India      | Landraces |
| PI 347375 | USDA     | <i>P. sativum</i> L.                                                         | PLP 304                       | India      | Landraces |
| PI 347383 | USDA     | <i>P. sativum</i> L.                                                         | PLP 316                       | India      | Landraces |
| PI 347385 | USDA     | <i>P. sativum</i> L.                                                         | PLP 320                       | India      | Landraces |
| PI 347388 | USDA     | <i>P. sativum</i> L.                                                         | PLP 330                       | India      | Landraces |
| PI 347389 | USDA     | <i>P. sativum</i> L.                                                         | PLP 332                       | India      | Landraces |
| PI 347401 | USDA     | <i>P. sativum</i> L.                                                         | PLP 363                       | India      | Landraces |
| PI 347471 | USDA     | <i>P. sativum</i> L.                                                         | PLP 450                       | India      | Landraces |
| PI 358642 | USDA     | <i>P. sativum</i> subsp. <i>sativum</i> var. <i>arvense</i> (L.) Poir.       | 22793                         | Ethiopia   | Landraces |
| PI 379612 | USDA     | <i>P. sativum</i> L.                                                         | WEIBULL 700                   | Sweden     | Cultivar  |
| PI 385981 | USDA     | <i>P. sativum</i> L.                                                         | ONWARD                        | UK         | Cultivar  |
| PI 399129 | USDA     | <i>P. sativum</i> L.                                                         | FLORIDA                       | Germany    | Cultivar  |
| PI 494079 | USDA     | <i>P. sativum</i> L.                                                         | G 27917                       | Chile      | Landraces |
| PI 560065 | USDA     | <i>P. fulvum</i> Sm.                                                         | CPI 134669                    | Israel     | wild      |
| PI 560067 | USDA     | <i>P. fulvum</i> Sm.                                                         | CPI 134471                    | Israel     | wild      |
| PI 595933 | USDA     | <i>P. fulvum</i> Sm.                                                         | ATC 113                       | Australia  | wild      |
| PI 595945 | USDA     | <i>P. fulvum</i> Sm.                                                         | CPI 53306                     | Jordan     | wild      |
| PI 595947 | USDA     | <i>P. fulvum</i> Sm.                                                         | VIR 2523                      | Israel     | wild      |
| JI 85     | JIC UK   | <i>P. sativum</i> L.                                                         | P.SATIVUM-AFGHANISTAN         | Afganistan | Landraces |
| JI 156    | JIC UK   | <i>P. sativum</i> L.                                                         | P.SATIVUM-USSR                | Sudan      | Landraces |
| JI 156    | JIC UK   | <i>P. sativum</i> L.                                                         | P.SATIVUM-USSR                | Sudan      | Landraces |
| JI 262    | JIC UK   | <i>P. sativum</i> subsp. <i>elatius</i> var. <i>elatius</i> (M. Bieb.) Alef. | P. ELATIUS                    | Turkey     | wild      |
| JI 263    | JIC UK   | <i>P. sativum</i> subsp. <i>sativum</i> var. <i>arvense</i> (L.) Poir.       | P.SATIVUM-BALKANS             | Greece     | wild      |
| JI 228    | JIC UK   | <i>P. sativum</i> L.                                                         | P.SATIVUM-BOLIVIA             | Bolivia    | Landraces |
| JI 209    | JIC UK   | <i>P. sativum</i> subsp. <i>sativum</i> var. <i>arvense</i> (L.) Poir.       | P.SATIVUM ARVENSE             | India      | Landraces |
| JI 209    | JIC UK   | <i>P. sativum</i> subsp. <i>sativum</i> var. <i>arvense</i> (L.) Poir.       | P.SATIVUM ARVENSE             | India      | Landraces |
| JI 207    | JIC UK   | <i>P. sativum</i> subsp. <i>sativum</i> var. <i>sativum</i>                  | P.SATIVUM CHORESMICUM         | UZBEKISTAN | Landraces |
| JI 224    | JIC UK   | <i>P. fulvum</i> Sm.                                                         | P. FULVUM                     | Israel     | wild      |
| JI 196    | JIC UK   | <i>P. sativum</i> subsp. <i>transcausicum</i> Govorov                        | P.SATIVUM-GEORGIA             | Georgia    | Landraces |
| JI 190    | JIC UK   | <i>P. sativum</i> L.                                                         | wiraig                        | Sudan      | Landraces |
| JI 189    | JIC UK   | <i>P. sativum</i> L.                                                         | wiraig                        | Sudan      | Landraces |
| JI 185    | JIC UK   | <i>P. sativum</i> L.                                                         | wiraig                        | Sudan      | Landraces |
| JI 267    | JIC UK   | <i>P. sativum</i> L.                                                         | P.SATIVUM-GREECE              | Greece     | wild      |
| JI 268    | JIC UK   | <i>P. sativum</i> L.                                                         | P.SATIVUM-CRETE               | Crete      | wild      |
| JI 275    | JIC UK   | <i>P. sativum</i> L.                                                         | P.SATIVUM-CRETE               | Crete      | wild      |
| JI 280    | JIC UK   | <i>P. sativum</i> L.                                                         | P.SATIVUM-ALBANIA             | Albania    | wild      |
| JI 288    | JIC UK   | <i>P. sativum</i> L.                                                         | P.SATIVUM-GREECE              | Greece     | wild      |
| JI 502    | JIC UK   | <i>P. sativum</i> L.                                                         | Rondo                         | Netherland | Cultivar  |
| JI 701    | JIC UK   | <i>P. sativum</i> L.                                                         | P.SATIVUM-ITALY               | Italy      | Landraces |
| JI 1030   | JIC UK   | <i>P. sativum</i> L.                                                         | P.SATIVUM-IRAN                | Iran       | Landraces |
| JI 1057   | JIC UK   | <i>P. sativum</i> L.                                                         | ANTIOQUIA I CHILENA           | Colombia   | Landraces |
| JI 1089   | JIC UK   | <i>P. sativum</i> subsp. <i>sativum</i> var. <i>arvense</i> (L.) Poir.       | P.elatius                     | Turkey     | Landraces |
| JI 1107   | JIC UK   | <i>P. sativum</i> L.                                                         | keerau pea                    | Nepal      | Landraces |
| JI 1213   | JIC UK   | <i>P. sativum</i> L.                                                         | erylis                        | France     | Cultivar  |
| JI 1345   | JIC UK   | <i>P. sativum</i> L.                                                         | P.SATIVUM-MONGOLIA            | Mongolia   | Landraces |
| JI 1346   | JIC UK   | <i>P. sativum</i> L.                                                         | P.SATIVUM-MONGOLIA            | Mongolia   | Landraces |
| JI 2263   | JIC UK   | <i>P. sativum</i> L.                                                         | WILD TUNESIAN                 | Germany    | Landraces |
| JI 2265   | JIC UK   | <i>P. sativum</i> L.                                                         | P.SATIVUM VAR. HIEMALE        | Albania    | Landraces |
| JI 2356   | JIC UK   | <i>P. sativum</i> L.                                                         | P.SATIVUM-NEPAL               | Nepal      | Landraces |
| JI 2385   | JIC UK   | <i>P. abyssinicum</i> A. Braun                                               | PISUM SP.-YEMEN               | Yemen      | Landraces |
| JI 2387   | JIC UK   | <i>P. sativum</i> L.                                                         | P.SATIVUM-Ethiopia            | Ethiopia   | Landraces |
| JI 2545   | JIC UK   | <i>P. sativum</i> L.                                                         | P. SATIVUM-PAKISTAN           | Pakistan   | Landraces |
| BGE001004 | CRF INIA | <i>P. sativum</i> subsp. <i>sativum</i>                                      | Garvanzo enano                | Spain      | Landraces |
| BGE001034 | CRF INIA | <i>P. sativum</i> subsp. <i>sativum</i> var. <i>sativum</i>                  | Pesol                         | Spain      | Landraces |
| BGE001121 | CRF INIA | <i>P. sativum</i> subsp. <i>sativum</i> var. <i>sativum</i>                  | Negrer                        | Spain      | Landraces |
| BGE001121 | CRF INIA | <i>P. sativum</i> subsp. <i>sativum</i> var. <i>sativum</i>                  | Negrer                        | Spain      | Landraces |
| BGE001662 | CRF INIA | <i>P. sativum</i> subsp. <i>sativum</i>                                      | Chicharo                      | Spain      | Landraces |
| BGE002168 | CRF INIA | <i>P. sativum</i> subsp. <i>sativum</i>                                      | Tito                          | Spain      | Landraces |
| BGE002168 | CRF INIA | <i>P. sativum</i> subsp. <i>sativum</i>                                      | Tito                          | Spain      | Landraces |
| BGE003315 | CRF INIA | <i>P. sativum</i> subsp. <i>sativum</i>                                      | Tirabeque                     | Spain      | Landraces |
| BGE004710 | CRF INIA | <i>P. sativum</i> subsp. <i>sativum</i>                                      | Ervilha                       | Portugal   | Landraces |
| BGE004713 | CRF INIA | <i>P. sativum</i> subsp. <i>sativum</i>                                      | Ervilha                       | Portugal   | Landraces |
| BGE004958 | CRF INIA | <i>P. sativum</i> subsp. <i>sativum</i>                                      | Ervilhoto                     | Portugal   | Landraces |
| BGE006125 | CRF INIA | <i>P. sativum</i> subsp. <i>sativum</i>                                      | Grizeu farroba                | Portugal   | Landraces |
| BGE006126 | CRF INIA | <i>P. sativum</i> subsp. <i>sativum</i> var. <i>sativum</i>                  | Ervilha                       | Portugal   | Landraces |
| BGE019594 | CRF INIA | <i>P. sativum</i> subsp. <i>sativum</i>                                      | Arveja                        | Spain      | Landraces |
| BGE022159 | CRF INIA | <i>P. sativum</i> subsp. <i>sativum</i> var. <i>arvense</i> (L.) Poir.       | Bisalto                       | Spain      | Landraces |
| BGE020326 | CRF INIA | <i>P. sativum</i> subsp. <i>sativum</i> var. <i>arvense</i> (L.) Poir.       | Bisalto del terreno           | Spain      | Landraces |
| BGE023256 | CRF INIA | <i>P. sativum</i> subsp. <i>sativum</i>                                      | Guisante                      | Spain      | Landraces |
| BGE025263 | CRF INIA | <i>P. sativum</i> subsp. <i>sativum</i> var. <i>sativum</i>                  | Guisante verde                | Spain      | Landraces |
| BGE025267 | CRF INIA | <i>P. sativum</i> subsp. <i>sativum</i>                                      | Mangano;Presol;Guisante claro | Spain      | Landraces |
| BGE025270 | CRF INIA | <i>P. sativum</i> subsp. <i>sativum</i>                                      | Guisante negro                | Spain      | Landraces |
| BGE026428 | CRF INIA | <i>P. sativum</i> subsp. <i>sativum</i> var. <i>sativum</i>                  | Guisante rastrero             | Spain      | Landraces |
| BGE026429 | CRF INIA | <i>P. sativum</i> subsp. <i>sativum</i>                                      | Arvilla                       | Spain      | Landraces |
| CGN16690  | CGN      | <i>P. sativum</i> L.                                                         |                               | Italy      | Landraces |

|             |            |                                                                    |                       |                 |                |
|-------------|------------|--------------------------------------------------------------------|-----------------------|-----------------|----------------|
| CGN03277    | CGN        | <i>P. sativum</i> L.                                               | NPE 378               | Pakistan        | Landraces      |
| CGN13253    | CGN        | <i>P. sativum</i> L.                                               | P.SATIVUM-Ethiopia    | Ethiopia        | Landraces      |
| CGN16640    | CGN        | <i>P. sativum</i> L.                                               | Khadraa               | Sudan           | Landraces      |
| CGN16562    | CGN        | <i>P. sativum</i> L.                                               | JI 1543               | Mongolia        | wild           |
| CGN16571    | CGN        | <i>P. sativum</i> subsp. <i>jomardii</i> (Schränk) Kosterin        | P. jomardii           | Egypt           | wild           |
| CGN16581    | CGN        | <i>P. sativum</i> L.                                               | JI 93                 | Afghanistan     | Landraces      |
| CGN16639    | CGN        | <i>P. sativum</i> L.                                               | JI 171                | Ethiopia        | Landraces      |
| CGN16679    | CGN        | <i>P. sativum</i> subsp. <i>cinereum</i> Govorov                   | JI 204                | Russia          | wild           |
| CGN16582    | CGN        | <i>P. sativum</i> L.                                               | Keerau pea            | Nepal           | Landraces      |
| CGN16684    | CGN        | <i>P. sativum</i> L.                                               |                       | Greece          | Landraces      |
| CGN16646    | CGN        | <i>P. sativum</i> L.                                               |                       | Mongolia        | Landraces      |
| CGN16636    | CGN        | <i>P. abyssinicum</i> A. Braun                                     | P. abyssinicum        | Ethiopia        | Landraces      |
| CGN03328    | CGN        | <i>P. sativum</i> L.                                               | NPE 1210.362A         | Pakistan        | Landraces      |
| CGN03170    | CGN        | <i>P. sativum</i> L.                                               | Turkey-19             | Irak            | Landraces      |
| CGN03190    | CGN        | <i>P. sativum</i> L.                                               | Kulur                 | Turkey          | Landraces      |
| CGN03245    | CGN        | <i>P. sativum</i> L.                                               | Ethiopia-32           | Ethiopia        | Landraces      |
| CGN03165    | CGN        | <i>P. sativum</i> L.                                               | Turkey-16             | Turkey          | Landraces      |
| CGN03289    | CGN        | <i>P. sativum</i> L.                                               | NPE 1175.346          | Pakistan        | Landraces      |
| CGN03171    | CGN        | <i>P. sativum</i> L.                                               | Selection 266/1       | Turkey          | breeding lines |
| CGN03290    | CGN        | <i>P. sativum</i> L.                                               | NPE 1180.392          | Pakistan        | Landraces      |
| CGN03305    | CGN        | <i>P. sativum</i> L.                                               | NPE 1169.248          | Pakistan        | Landraces      |
| CGN02921    | CGN        | <i>P. sativum</i> subsp. <i>sativum</i> var. <i>sativum</i>        | Semi Nano Ideal       | Italy           | Cultivar       |
| CGN03003    | CGN        | <i>P. sativum</i> subsp. <i>sativum</i> var. <i>sativum</i>        | Petit Provencal       | France          | Cultivar       |
| CGN03273    | CGN        | <i>P. sativum</i> L.                                               | 950 3e                | Peru            | breeding lines |
| CGN03229    | CGN        | <i>P. sativum</i> L.                                               | Ethiopia-31           | Ethiopia        | Landraces      |
| PI 413686   | USDA       | <i>P. sativum</i> L.                                               | FELICITAS             | Hungary         | Cultivar       |
| PI 477371   | USDA       | <i>P. sativum</i> L.                                               | ROSAKRONE             | Denmark         | Cultivar       |
| PI 307666   | USDA       | <i>P. sativum</i> L.                                               | VERJA                 | Costa Rica      | Landraces      |
| PI 307666   | USDA       | <i>P. sativum</i> L.                                               | VERJA                 | Costa Rica      | Landraces      |
| PI 324693   | USDA       | <i>P. sativum</i> L.                                               | ABESINIJAS            | Hungary         | Cultivar       |
| PI 324705   | USDA       | <i>P. sativum</i> L.                                               | No. 830               | France          | Unknown        |
| PI 355905   | USDA       | <i>P. sativum</i> subsp. <i>sativum</i> var. <i>sativum</i>        | KAIRYO AOTENASHI      | Japan           | Cultivar       |
| PI 241593   | USDA       | <i>P. sativum</i> L.                                               | G 6571                | Taiwan          | Unknown        |
| PI 273207   | USDA       | <i>P. sativum</i> subsp. <i>elatius</i> (M. Bieb.) Asch. & Graebn. | 9006/60               | Bulgaria        | Landraces      |
| PI 266070   | USDA       | <i>P. sativum</i> subsp. <i>sativum</i> var. <i>sativum</i>        | LINE NO. 930          | Sweden          | breeding lines |
| PI 198074   | USDA       | <i>P. sativum</i> L.                                               | GORS DAGSART III      | Sweden          | Landraces      |
| PI 357292   | USDA       | <i>P. sativum</i> subsp. <i>sativum</i> var. <i>sativum</i>        | KIFLICA               | North Macedonia | Cultivar       |
| PI 357293   | USDA       | <i>P. sativum</i> subsp. <i>sativum</i> var. <i>sativum</i>        | DEBARSKI              | North Macedonia | Cultivar       |
| PI 249645   | USDA       | <i>P. sativum</i> L.                                               | B.R. 178              | India           | Landraces      |
| PI 357048   | USDA       | <i>P. sativum</i> subsp. <i>elatius</i> (M. Bieb.) Asch. & Graebn. | PLP 514               | India           | wild           |
| PI 357289   | USDA       | <i>P. sativum</i> subsp. <i>sativum</i> var. <i>sativum</i>        | RAN                   | North Macedonia | Cultivar       |
| PI 253968   | USDA       | <i>P. sativum</i> subsp. <i>elatius</i> (M. Bieb.) Asch. & Graebn. | Col. No. K1722        | Afghanistan     | Landraces      |
| PI 103058   | USDA       | <i>P. sativum</i> L.                                               | No. 10                | China           | Cultivar       |
| PI 180329   | USDA       | <i>P. sativum</i> L.                                               | Watana                | India           | Landraces      |
| PI 184131   | USDA       | <i>P. sativum</i> subsp. <i>sativum</i> var. <i>sativum</i>        | No. 310               | Serbia          | Landraces      |
| PI 124478   | USDA       | <i>P. sativum</i> L.                                               | Matar                 | Pakistan        | Landraces      |
| PI 124479   | USDA       | <i>P. sativum</i> L.                                               | Matar                 | Pakistan        | Landraces      |
| PI 124479   | USDA       | <i>P. sativum</i> L.                                               | Matar                 | Pakistan        | Landraces      |
| JI 2480     | JIC        | <i>P. sativum</i> L.                                               | CGN 3352              | Peru            | breeding lines |
| JI 1951     | JIC        | <i>P. sativum</i> L.                                               | P.SATIVUM-CHINA       | China           | Cultivar       |
| JI 2302     | JIC        | <i>P. sativum</i> subsp. <i>sativum</i> var. <i>sativum</i>        | B76-197 (STRATAGEM)   | Sweden          | breeding lines |
| JI 1566     | JIC        | <i>P. sativum</i> L.                                               | Almota                | USA             | Cultivar       |
| PI 608038   | USDA       | <i>P. sativum</i> L.                                               | 74SN5                 | USA             | Cultivar       |
| PI 613100   | USDA       | <i>P. sativum</i> L.                                               | MINI                  | USA             | Cultivar       |
| Atc-4235-53 | Commercial | <i>P. sativum</i> L.                                               | Atc-4235-53           | Australia       | breeding lines |
| Boreen      | Commercial | <i>P. sativum</i> L.                                               | Boreen                | Australia       | Cultivar       |
| Dandale     | Commercial | <i>P. sativum</i> L.                                               | Dandale               | Australia       | Cultivar       |
| Kagpa       | Commercial | <i>P. sativum</i> L.                                               | Kagpa                 | Australia       | Cultivar       |
| M5          | Commercial | <i>P. sativum</i> L.                                               | M5                    | Australia       | Cultivar       |
| Pinochio    | Commercial | <i>P. sativum</i> L.                                               | Pinochio              | Denmark         | Cultivar       |
| B 99-114    | Commercial | <i>P. sativum</i> L.                                               | B 99-114              | Czech Republic  | breeding lines |
| AGT 205,21  | Commercial | <i>P. sativum</i> L.                                               | AGT 205,21            | Czech Republic  | breeding lines |
| Morris      | Commercial | <i>P. sativum</i> L.                                               | Morris                | Czech Republic  | Cultivar       |
| JI 1210     | JIC        | <i>P. sativum</i> L.                                               | erygel                | France          | Cultivar       |
| JI 1412     | JIC        | <i>P. sativum</i> L.                                               | Marlin                | USA             | Cultivar       |
| JI 1559     | JIC        | <i>P. sativum</i> L.                                               | Mexique 4             | Mexico          | Cultivar       |
| JI 1747     | JIC        | <i>P. sativum</i> L.                                               | Almires               | Germany         | Cultivar       |
| JI 1760     | JIC        | <i>P. sativum</i> subsp. <i>sativum</i> var. <i>sativum</i>        | Consort-af            | UK              | Cultivar       |
| JI 210      | JIC        | <i>P. sativum</i> L.                                               | Lucknow Boniya        | India           | Cultivar       |
| JI 252      | JIC        | <i>P. sativum</i> L.                                               | P.SATIVUM-Ethiopia    | Ethiopia        | Landraces      |
| JI 82       | JIC        | <i>P. sativum</i> L.                                               | P.SATIVUM-AFGHANISTAN | Afghanistan     | Landraces      |
| Messire     | IAS        | <i>P. sativum</i> subsp. <i>sativum</i> var. <i>sativum</i>        | Messire               | France          | Cultivar       |
| Radley      | IAS        | <i>P. sativum</i> subsp. <i>sativum</i> var. <i>sativum</i>        | Radley                | UK              | Cultivar       |
| Ballet      | IAS        | <i>P. sativum</i> subsp. <i>sativum</i> var. <i>sativum</i>        | Ballet                | UK              | Cultivar       |
| W6 17515    | USDA       | <i>P. sativum</i> subsp. <i>sativum</i> var. <i>sativum</i>        | LITTLE MARVEL         | USA             | Cultivar       |
| W6 17516    | USDA       | <i>P. sativum</i> subsp. <i>sativum</i> var. <i>sativum</i>        | DARK SKIN PERFECTION  | USA             | Cultivar       |
| W6 17517    | USDA       | <i>P. sativum</i> subsp. <i>sativum</i> var. <i>sativum</i>        | NEW ERA               | USA             | Cultivar       |
| W6 17518    | USDA       | <i>P. sativum</i> subsp. <i>sativum</i> var. <i>sativum</i>        | NEW SEASON            | USA             | Cultivar       |
| W6 17520    | USDA       | <i>P. sativum</i> subsp. <i>sativum</i> var. <i>sativum</i>        | WSU 28                | USA             | Cultivar       |
| KEBBY       | Commercial | <i>P. sativum</i> subsp. <i>sativum</i> var. <i>sativum</i>        | Kebby                 | UK              | Cultivar       |
| POLAR       | Commercial | <i>P. sativum</i> subsp. <i>sativum</i> var. <i>sativum</i>        | Polar                 | Spain           | Cultivar       |

|             |              |                                                                              |                   |             |                |
|-------------|--------------|------------------------------------------------------------------------------|-------------------|-------------|----------------|
| W6 17519    | USDA         | <i>P. sativum</i> subsp. <i>sativum</i> var. <i>sativum</i>                  | WSU 23            | Unknow      | Cultivar       |
| W6 17521    | USDA         | <i>P. sativum</i> subsp. <i>sativum</i> var. <i>sativum</i>                  | WSU 31            | Unknow      | Cultivar       |
| BGE023667   | INIA         | <i>P. sativum</i> subsp. <i>sativum</i>                                      | Guisante          | Spain       | Landraces      |
| BGE025727   | INIA         | <i>P. sativum</i> subsp. <i>sativum</i>                                      | Guisante          | Spain       | Landraces      |
| PI 358608   | USDA-EEUU    | <i>P. sativum</i> subsp. <i>sativum</i> var. <i>arvense</i> (L.) Poir.       | 22770B            | Ethiopia    | Landraces      |
| PI 358609   | USDA-EEUU    | <i>P. abyssinicum</i> A. Braun                                               | WAT               | Ethiopia    | wild           |
| PI 173055   | USDA-EEUU    | <i>P. sativum</i> subsp. <i>elatius</i> var. <i>elatius</i> (M. Bieb.) Alef. | HATUN BAKLERI     | Turkey      | Landraces      |
| PI 120617   | USDA-EEUU    | <i>P. sativum</i> subsp. <i>elatius</i> var. <i>elatius</i> (M. Bieb.) Alef. | No. 738           | Turkey      | Landraces      |
| PI 273209   | USDA-EEUU    | <i>P. sativum</i> subsp. <i>elatius</i> var. <i>elatius</i> (M. Bieb.) Alef. | 9009/60           | Russia      | Landraces      |
| PI 344003   | USDA-EEUU    | <i>P. sativum</i> subsp. <i>elatius</i> var. <i>elatius</i> (M. Bieb.) Alef. | 22703             | Turkey      | wild           |
| PI 344005   | USDA-EEUU    | <i>P. sativum</i> subsp. <i>elatius</i> var. <i>elatius</i> (M. Bieb.) Alef. | 22611             | Greece      | wild           |
| PI 344006   | USDA-EEUU    | <i>P. sativum</i> subsp. <i>elatius</i> var. <i>elatius</i> (M. Bieb.) Alef. | 22618             | Greece      | wild           |
| PI 343976   | USDA-EEUU    | <i>P. sativum</i> subsp. <i>elatius</i> var. <i>elatius</i> (M. Bieb.) Alef. | 22716             | Turkey      | wild           |
| PI 505059   | USDA-EEUU    | <i>P. sativum</i> subsp. <i>elatius</i> var. <i>elatius</i> (M. Bieb.) Alef. | ILCA 5076         | Sudan       | Landraces      |
| PI 344010   | USDA-EEUU    | <i>P. sativum</i> subsp. <i>elatius</i> var. <i>elatius</i> (M. Bieb.) Alef. | 22732             | Greece      | wild           |
| PI 344011   | USDA-EEUU    | <i>P. sativum</i> subsp. <i>elatius</i> var. <i>elatius</i> (M. Bieb.) Alef. | 22733             | Greece      | wild           |
| PI 344013   | USDA-EEUU    | <i>P. sativum</i> subsp. <i>elatius</i> var. <i>elatius</i> (M. Bieb.) Alef. | 22735             | Greece      | wild           |
| PI 116056   | USDA-EEUU    | <i>P. sativum</i> subsp. <i>sativum</i>                                      | Matar             | India       | Landraces      |
| PI 505127   | USDA-EEUU    | <i>P. sativum</i> subsp. <i>sativum</i>                                      | ILCA 5094         | Albania     | Landraces      |
| PI 242027   | USDA-EEUU    | <i>P. sativum</i> subsp. <i>jomardii</i> (Schränk) Kosterin                  | G 11764           | Denmark     | Unknown        |
| PI 269762   | USDA-EEUU    | <i>P. sativum</i> subsp. <i>jomardii</i> (Schränk) Kosterin                  | Aa38              | UK          | Landraces      |
| PI 343987   | USDA-EEUU    | <i>P. sativum</i> subsp. <i>sativum</i> var. <i>sativum</i>                  | 22718             | Turkey      | Landraces      |
| PI 505080   | USDA-EEUU    | <i>P. sativum</i> subsp. <i>sativum</i>                                      | ILCA 5039         | Cyprus      | Unknown        |
| PI 505111   | USDA-EEUU    | <i>P. sativum</i> subsp. <i>sativum</i>                                      | ILCA 5075         | Syria       | Landraces      |
| PI 268480   | USDA-EEUU    | <i>P. sativum</i> subsp. <i>elatius</i> var. <i>pumilio</i> Meikle           | Col. No. 317      | Afghanistan | Landraces      |
| JI 45       | JIC          | <i>P. sativum</i> subsp. <i>transcaucasicum</i> Govorov                      | P.TRANSCAUCASICUM | Georgia     | wild           |
| JI 198      | JIC          | <i>P. sativum</i> subsp. <i>elatius</i> var. <i>elatius</i> (M. Bieb.) Alef. | P. ELATIUS        | Israel      | wild           |
| JI 199      | JIC          | <i>P. sativum</i> subsp. <i>elatius</i> var. <i>elatius</i> (M. Bieb.) Alef. | P. ELATIUS        | Israel      | wild           |
| JI 225      | JIC          | <i>P. abyssinicum</i> A. Braun                                               | P. ABYSSINICUM    | Ethiopia    | Landraces      |
| JI 227      | JIC          | <i>P. abyssinicum</i> A. Braun                                               | P. ABYSSINICUM    | Ethiopia    | Landraces      |
| JI 241      | JIC          | <i>P. sativum</i> subsp. <i>elatius</i> var. <i>pumilio</i> Meikle           | P. HUMILE         | Israel      | wild           |
| JI 254      | JIC          | <i>P. sativum</i> subsp. <i>elatius</i> var. <i>elatius</i> (M. Bieb.) Alef. | P. ELATIUS        | Ethiopia    | wild           |
| JI 804      | JIC          | <i>P. sativum</i> subsp. <i>sativum</i> var. <i>sativum</i>                  | P.TIBETANICUM     | Unknow      | Landraces      |
| JI 1398     | JIC          | <i>P. sativum</i> L.                                                         | P.SATIVUM         | China       | Landraces      |
| JI 1428     | JIC          | <i>P. sativum</i> subsp. <i>sativum</i> var. <i>sativum</i>                  | P.TIBETANICUM     | Tibet       | wild           |
| JI 1854     | JIC          | <i>P. sativum</i> subsp. <i>elatius</i> var. <i>pumilio</i> Meikle           | P. HUMILE         | Israel      | Landraces      |
| JI 2116     | JIC          | <i>P. sativum</i> subsp. <i>sativum</i> var. <i>sativum</i>                  | P.SPECIOSUM       | Spain       | Landraces      |
| JI 2202     | JIC          | <i>P. abyssinicum</i> A. Braun                                               | P. ABYSSINICUM    | Yemen       | Landraces      |
| PIS 1318/91 | IPK          | <i>P. sativum</i> subsp. <i>elatius</i> (M. Bieb.) Asch. & Graebn.           |                   | Unknow      | Unknown        |
| CGN10205    | CGN          | <i>P. sativum</i> subsp. <i>elatius</i> var. <i>elatius</i> (M. Bieb.) Alef. | 1140175           | Turkey      | Landraces      |
| CGN10206    | CGN          | <i>P. sativum</i> subsp. <i>elatius</i> var. <i>elatius</i> (M. Bieb.) Alef. | 1145176           | Unknow      | breeding lines |
| CGN10193    | CNG          | <i>P. sativum</i> subsp. <i>sativum</i> var. <i>arvense</i> (L.) Poir.       |                   | Unknow      | Unknown        |
| IFPI 3365   | ICARDA-Siria | <i>P. sativum</i> subsp. <i>elatius</i> var. <i>elatius</i> (M. Bieb.) Alef. | IG 52524          | Turkey      | wild           |
| IFPI 3370   | ICARDA-Siria | <i>P. sativum</i> subsp. <i>elatius</i> var. <i>elatius</i> (M. Bieb.) Alef. | IG 52529          | Turkey      | wild           |
| IFPI 387    | ICARDA-Siria | <i>P. sativum</i> subsp. <i>thebaicum</i>                                    | IG 49546          | USSR        | wild           |
| IFPI 436    | ICARDA-Siria | <i>P. sativum</i> subsp. <i>jomardii</i> (Schränk) Kosterin                  | IG 49595          | Egypt       | Landraces      |
| IFPI 2348   | ICARDA-Siria | <i>P. sativum</i> subsp. <i>sativum</i> var. <i>arvense</i> (L.) Poir.       | IG 51507          | Ethiopia    | Landraces      |
| IFPI 2350   | ICARDA-Siria | <i>P. sativum</i> subsp. <i>sativum</i> var. <i>arvense</i> (L.) Poir.       | IG 51509          | Ethiopia    | Landraces      |
| IFPI 2351   | ICARDA-Siria | <i>P. sativum</i> subsp. <i>sativum</i> var. <i>arvense</i> (L.) Poir.       | IG 51510          | Ethiopia    | Landraces      |
| IFPI 2352   | ICARDA-Siria | <i>P. sativum</i> subsp. <i>sativum</i> var. <i>arvense</i> (L.) Poir.       | IG 51511          | Ethiopia    | Landraces      |
| IFPI 2353   | ICARDA-Siria | <i>P. sativum</i> subsp. <i>sativum</i> var. <i>arvense</i> (L.) Poir.       | IG 51512          | Ethiopia    | Landraces      |
| IFPI 2354   | ICARDA-Siria | <i>P. sativum</i> subsp. <i>sativum</i> var. <i>arvense</i> (L.) Poir.       | IG 51513          | Ethiopia    | Landraces      |
| IFPI 2356   | ICARDA-Siria | <i>P. sativum</i> subsp. <i>sativum</i> var. <i>arvense</i> (L.) Poir.       | IG 51515          | Ethiopia    | Landraces      |
| IFPI 2357   | ICARDA-Siria | <i>P. sativum</i> subsp. <i>sativum</i> var. <i>arvense</i> (L.) Poir.       | IG 51516          | Ethiopia    | Landraces      |
| IFPI 2358   | ICARDA-Siria | <i>P. sativum</i> subsp. <i>sativum</i> var. <i>arvense</i> (L.) Poir.       | IG 51517          | Ethiopia    | Landraces      |
| IFPI 2360   | ICARDA-Siria | <i>P. sativum</i> subsp. <i>sativum</i> var. <i>arvense</i> (L.) Poir.       | IG 51519          | Ethiopia    | Landraces      |
| IFPI 2362   | ICARDA-Siria | <i>P. sativum</i> subsp. <i>sativum</i> var. <i>arvense</i> (L.) Poir.       | IG 51521          | Ethiopia    | Landraces      |
| IFPI 2363   | ICARDA-Siria | <i>P. sativum</i> subsp. <i>sativum</i> var. <i>arvense</i> (L.) Poir.       | IG 51522          | Ethiopia    | Landraces      |
| IFPI 2364   | ICARDA-Siria | <i>P. sativum</i> subsp. <i>sativum</i> var. <i>arvense</i> (L.) Poir.       | IG 51523          | Ethiopia    | Landraces      |
| IFPI 2365   | ICARDA-Siria | <i>P. sativum</i> subsp. <i>sativum</i> var. <i>arvense</i> (L.) Poir.       | IG 51524          | Ethiopia    | Landraces      |
| IFPI 2367   | ICARDA-Siria | <i>P. sativum</i> subsp. <i>sativum</i> var. <i>arvense</i> (L.) Poir.       | IG 51526          | Ethiopia    | Landraces      |
| IFPI 2369   | ICARDA-Siria | <i>P. sativum</i> subsp. <i>sativum</i> var. <i>arvense</i> (L.) Poir.       | IG 51528          | Ethiopia    | Landraces      |
| IFPI 2370   | ICARDA-Siria | <i>P. sativum</i> subsp. <i>sativum</i> var. <i>arvense</i> (L.) Poir.       | IG 51529          | Ethiopia    | Landraces      |
| IFPI 2371   | ICARDA-Siria | <i>P. sativum</i> subsp. <i>sativum</i> var. <i>arvense</i> (L.) Poir.       | IG 51530          | Ethiopia    | Landraces      |
| IFPI 2372   | ICARDA-Siria | <i>P. sativum</i> subsp. <i>sativum</i> var. <i>arvense</i> (L.) Poir.       | IG 51531          | Ethiopia    | Landraces      |
| IFPI 2441   | ICARDA-Siria | <i>P. sativum</i> subsp. <i>jomardii</i> (Schränk) Kosterin                  | IG 51600          | Denmark     | Unknown        |
| IFPI 2495   | ICARDA-Siria | <i>P. sativum</i> subsp. <i>jomardii</i> (Schränk) Kosterin                  | IG 51654          | UK          | Landraces      |
| IFPI 3232   | ICARDA-Siria | <i>P. fulvum</i> Sm.                                                         | IG 52391          | Syria       | Wild           |
| IFPI 3250   | ICARDA-Siria | <i>P. sativum</i> L.                                                         | IG 52409          | Syria       | wild           |
| IFPI 3252   | ICARDA-Siria | <i>P. sativum</i> subsp. <i>elatius</i> (M. Bieb.) Asch. & Graebn.           | IG 52411          | Syria       | wild           |
| IFPI 3253   | ICARDA-Siria | <i>P. fulvum</i> Sm.                                                         | IG 52412          | Syria       | wild           |
| IFPI 3257   | ICARDA-Siria | <i>P. fulvum</i> Sm.                                                         | IG 52416          | Syria       | wild           |
| IFPI 3260   | ICARDA-Siria | <i>P. fulvum</i> Sm.                                                         | IG 52419          | Syria       | wild           |
| IFPI 3261   | ICARDA-Siria | <i>P. fulvum</i> Sm.                                                         | IG 52420          | Syria       | wild           |
| IFPI 3262   | ICARDA-Siria | <i>P. fulvum</i> Sm.                                                         | IG 52421          | Syria       | wild           |
| IFPI 3280   | ICARDA-Siria | <i>P. sativum</i> subsp. <i>elatius</i> (M. Bieb.) Asch. & Graebn.           | IG 52439          | Syria       | wild           |
| IFPI 3282   | ICARDA-Siria | <i>P. sativum</i> subsp. <i>elatius</i> (M. Bieb.) Asch. & Graebn.           | IG 52441          | Syria       | wild           |
| IFPI 3330   | ICARDA-Siria | <i>P. sativum</i> subsp. <i>elatius</i> var. <i>elatius</i> (M. Bieb.) Alef. | IG 52489          | Turkey      | wild           |
| IFPI 3334   | ICARDA-Siria | <i>P. sativum</i> subsp. <i>elatius</i> var. <i>elatius</i> (M. Bieb.) Alef. | IG 52493          | Turkey      | wild           |
| IFPI 3338   | ICARDA-Siria | <i>P. sativum</i> subsp. <i>elatius</i> var. <i>elatius</i> (M. Bieb.) Alef. | IG 52497          | Turkey      | wild           |
| IFPI 3358   | ICARDA-Siria | <i>P. sativum</i> subsp. <i>elatius</i> var. <i>elatius</i> (M. Bieb.) Alef. | IG 52517          | Turkey      | wild           |

**Supplementary Table S2.** Differences between groups in pea panel grouped by material type, growth condition and taxonomy.

| Grouped by <sup>a</sup> | Group 1                                                     | Group 2                                                     | Signif. <sup>b</sup> |
|-------------------------|-------------------------------------------------------------|-------------------------------------------------------------|----------------------|
| Material type           | Breeding Line                                               | Cultivar                                                    | *                    |
| Material type           | Cultivar                                                    | Landraces                                                   | ****                 |
| Material type           | Cultivar                                                    | Wild                                                        | ****                 |
| Growing Condition       | DS <sub>2018</sub>                                          | DS <sub>2019</sub>                                          | ***                  |
| Growing Condition       | DS <sub>2018</sub>                                          | DS <sub>2020</sub>                                          | ****                 |
| Growing Condition       | DS <sub>2019</sub>                                          | DS <sub>2020</sub>                                          | ****                 |
| Growing Condition       | DS <sub>2018</sub>                                          | DS <sub>cc</sub>                                            | ****                 |
| Growing Condition       | DS <sub>2019</sub>                                          | DS <sub>cc</sub>                                            | ****                 |
| Growing Condition       | DS <sub>2020</sub>                                          | DS <sub>cc</sub>                                            | ****                 |
| Taxonomy                | <i>P. fulvum</i> Sm.                                        | <i>P. sativum</i> subsp. <i>sativum</i> var. <i>sativum</i> | **                   |
| Taxonomy                | <i>P. sativum</i> L.                                        | <i>P. sativum</i> subsp. <i>sativum</i> var. <i>sativum</i> | ****                 |
| Taxonomy                | <i>P. sativum</i> subsp. <i>sativum</i> var. <i>arvense</i> | <i>P. sativum</i> subsp. <i>sativum</i> var. <i>sativum</i> | **                   |
| Taxonomy                | <i>P. sativum</i> subsp. <i>sativum</i> var. <i>sativum</i> | <i>P. sativum</i> subsp. <i>elatius</i> var. <i>elatius</i> | ****                 |

<sup>a</sup> Grouped by column attend to Material type (Breeding Line, Cultivar, Landrace, Wild or Unknown), Growth Condition (Disease severity in Controlled Conditions (DS<sub>cc</sub>) or Disease Severity in environments Co-2018, Co-2019 or Co-202 (DS<sub>2018</sub>, DS<sub>2019</sub> and DS<sub>2020</sub>, respectively)) and *Pisum* taxonomy.

<sup>b</sup> Signif. column reveals the statistical significance in the Wilcoxon test: \* = p < 0,05, \*\* = p < 0,01, \*\*\* = p < 0,001, \*\*\*\* = p < 0,0001
